# Supplementary material for: High-Throughput Wastewater SARS-CoV-2 Detection Enables Forecasting of Community Infection Dynamics in San Diego County
Source: PubMed Central journal article supplement (PMC8546963; doi:10.1128/msystems.00045-21), 2021-03-02

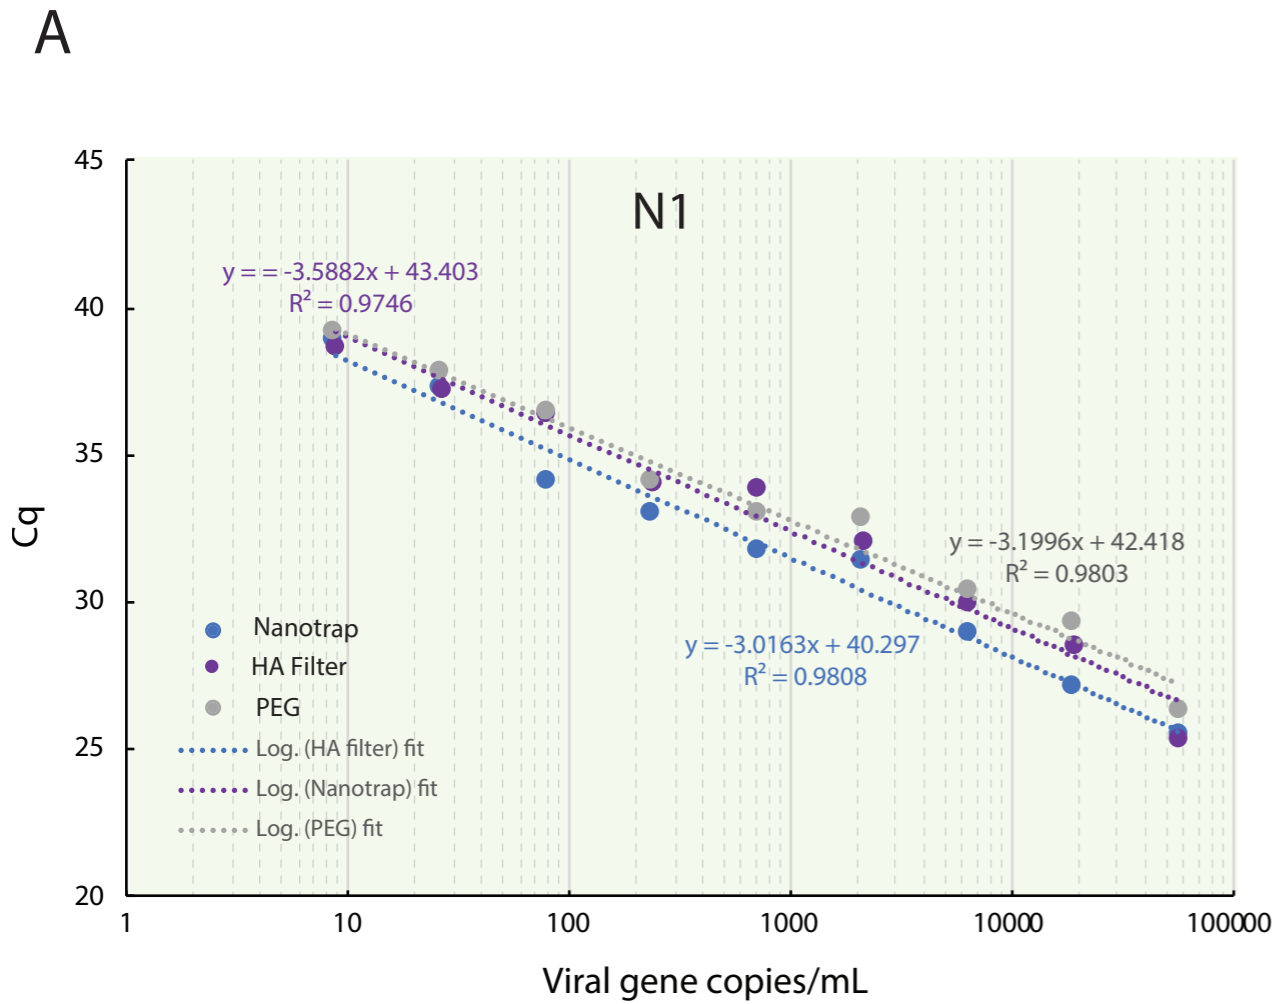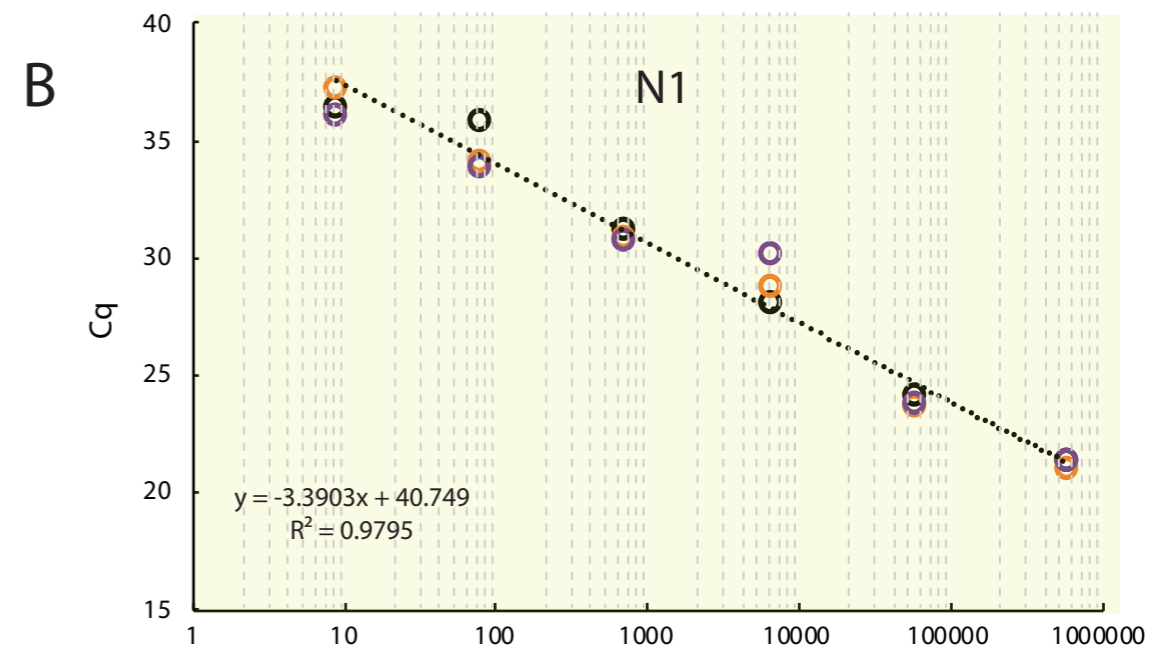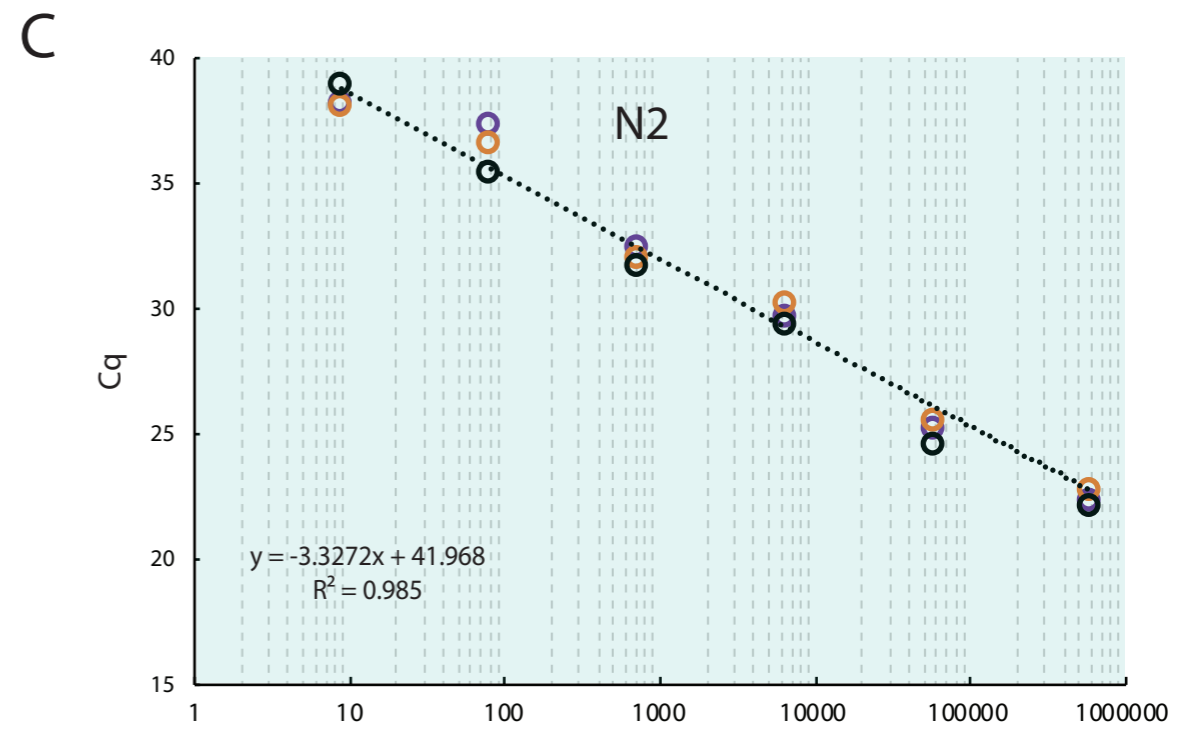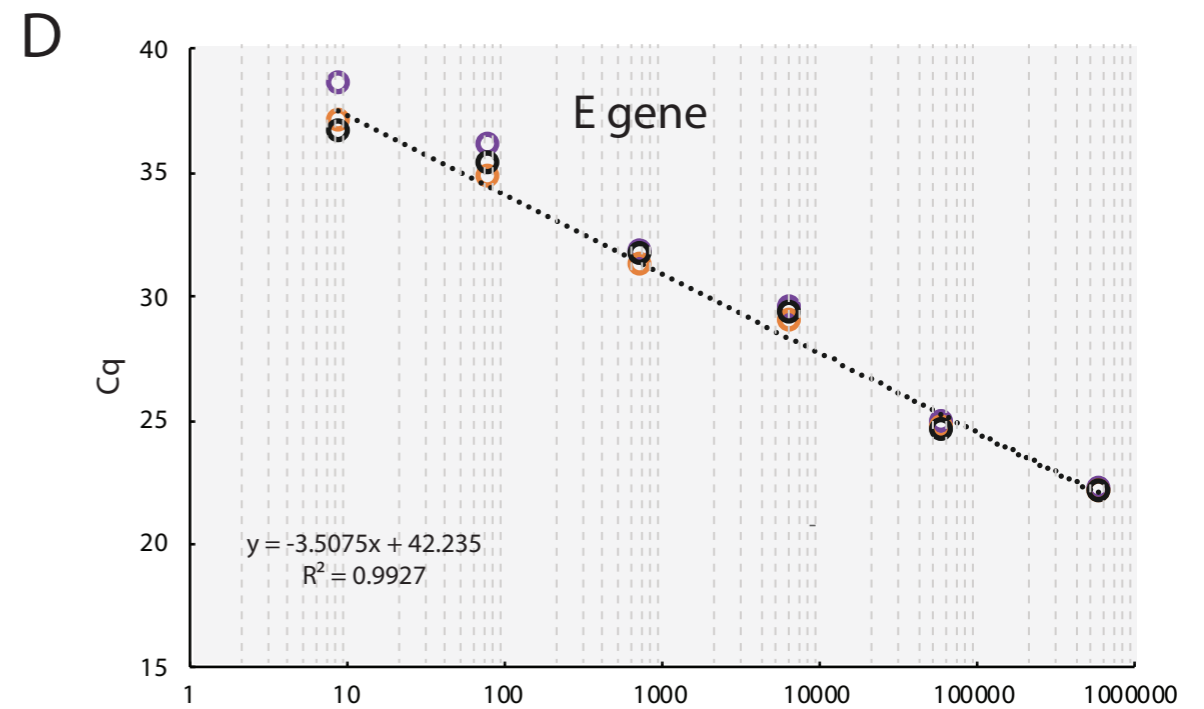

Supplement: msystems.00045-21-sf002.pdf [file msystems.00045-21-sf002.pdf]
